# Supplementary material for: Novel redox-responsive nanogels based on poly(ionic liquid)s for the triggered loading and release of cargos
Source: Royal Society of Chemistry journal article supplement (doi:10.1039/c5ra21820a), 2015-12-23
Supplement: c5ra21820a1.pdf [file c5ra21820a1.pdf]

**Novel redox-responsive nanogel based on poly(ionic liquid)s for the triggered loading and release of cargos**

**Congcong Miao,<sup>1</sup> Feng Li,<sup>1</sup> Yong Zuo,<sup>1</sup> Rongmin Wang,<sup>1</sup> and Yubing Xiong<sup>1,2\*</sup>**

- <sup>1</sup> Key Laboratory of Eco-Environment-Related Polymer Materials, Ministry of Education; College of Chemistry and Chemical Engineering, Northwest Normal University, Lanzhou 730070, China
- <sup>2</sup> Max Planck Institute for Polymer Research, Ackermannweg 10, Mainz 55128, Germany;

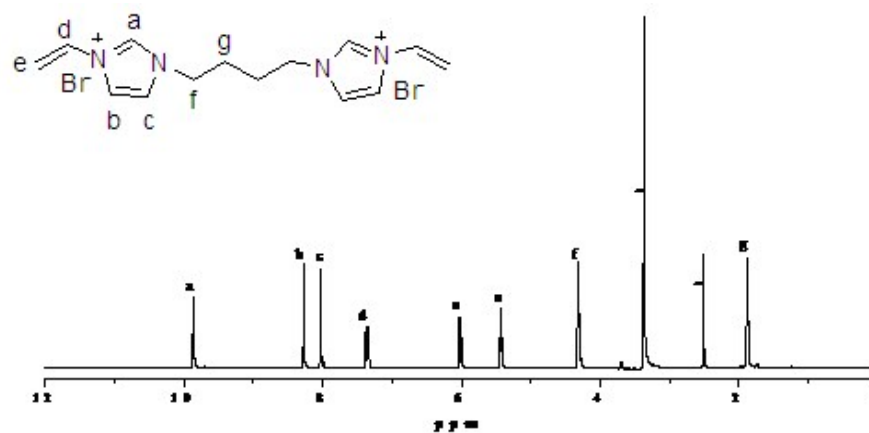

**Figure S1** <sup>1</sup>H NMR spectrum of [C<sub>4</sub>VIm]<sup>+</sup>Br<sup>-</sup> in d<sup>6</sup>-DMSO.

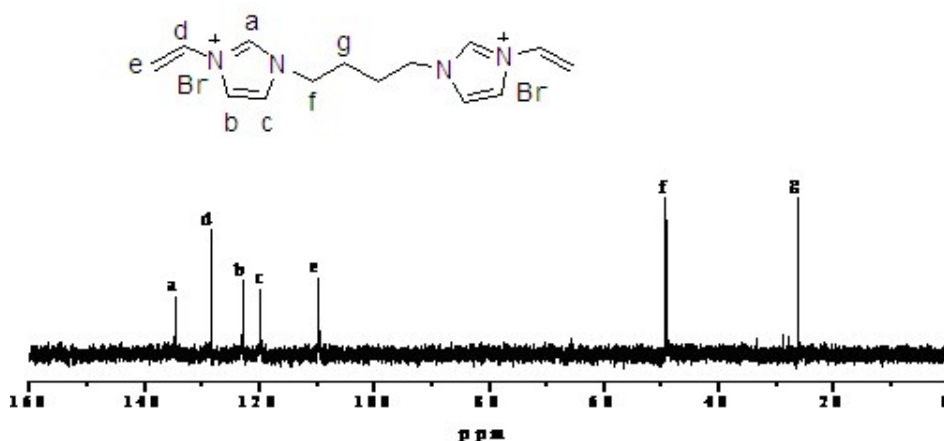

**Figure S2** <sup>1</sup>H NMR spectrum of [C<sub>4</sub>VIm]<sup>+</sup>Br<sup>-</sup> in D<sub>2</sub>O.

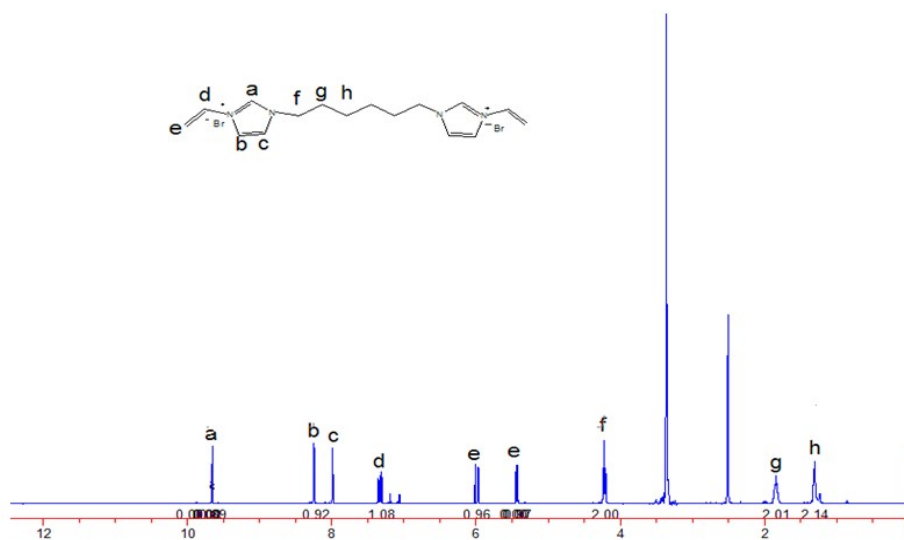

**Figure S3** <sup>1</sup>H NMR spectrum of [C<sub>6</sub>VIm]Br in d<sup>6</sup>-DMSO.

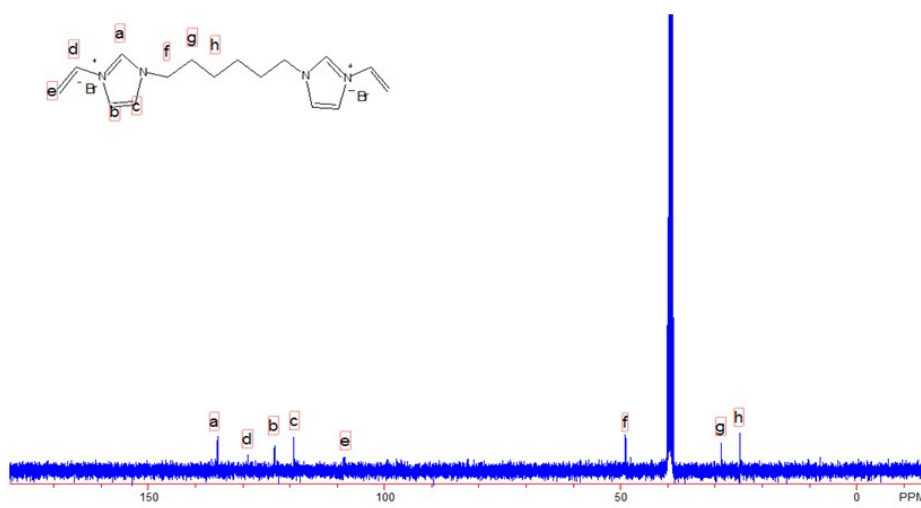

**Figure S4** <sup>13</sup>C NMR spectrum of [C<sub>6</sub>VIm]Br in d<sup>6</sup>-DMSO.

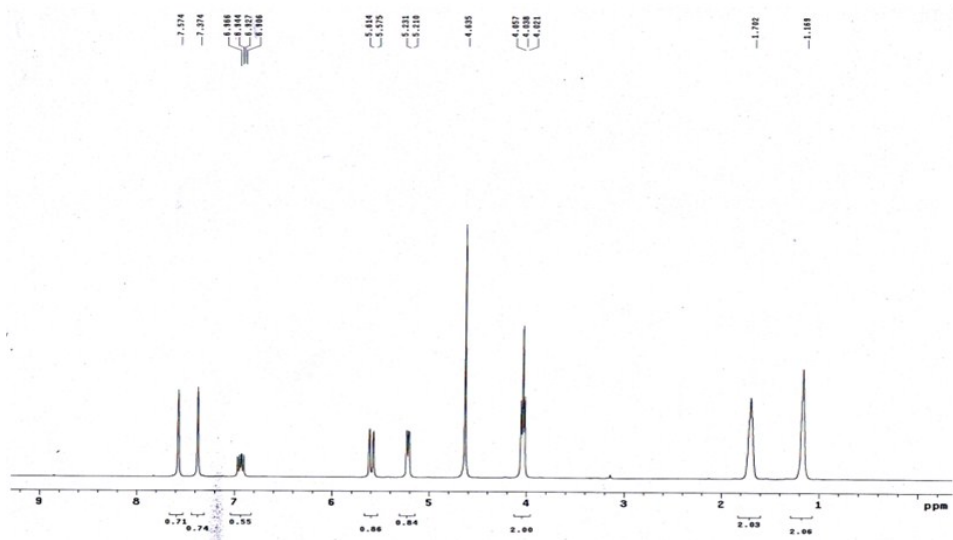

**Figure S5**  $^1\text{H}$  NMR spectrum of  $[\text{C}_6\text{VIm}]\text{Br}$  in  $\text{D}_2\text{O}$

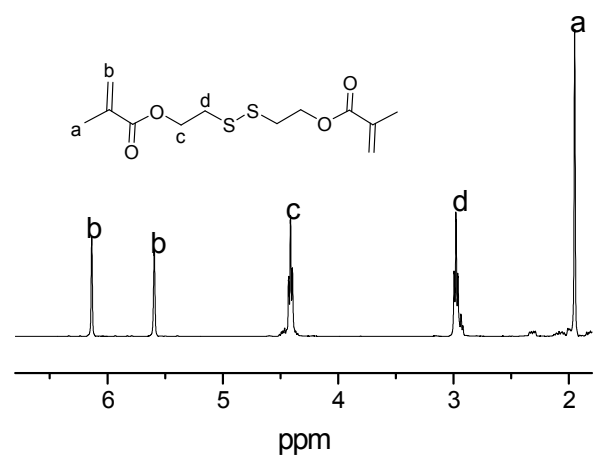

**Figure S6**  $^1\text{H}$  NMR spectrum of DSDMA in  $\text{d}^6\text{-DMSO}$ .

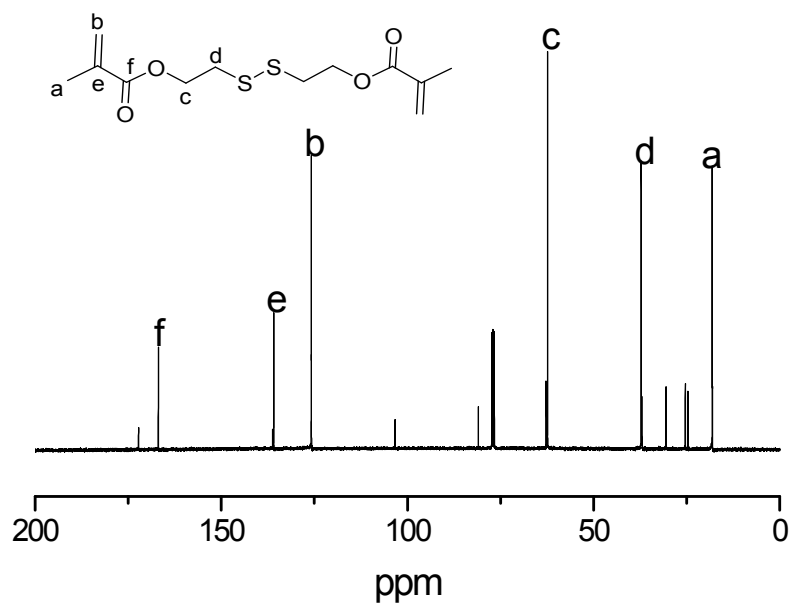

**Figure S7**  $^{13}\text{C}$  NMR spectrum of DSDMA in  $\text{d}^6\text{-DMSO}$ .

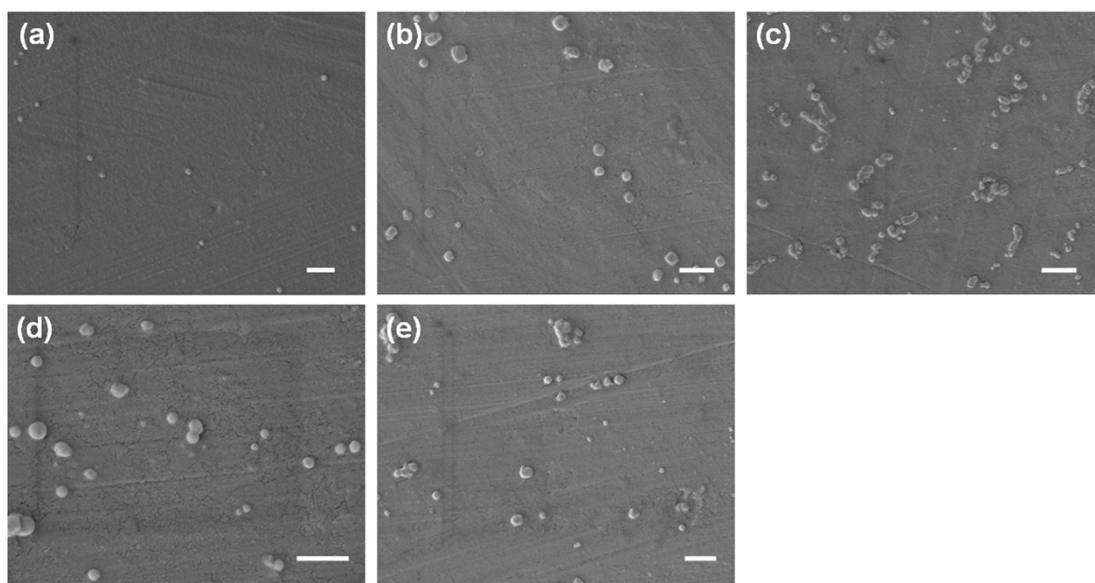

**Figure S8** SEM images of BlmIL-based nanogels (a NG1; b NG2; c NG4; d NG7; e NG8. All the scale bar are 1  $\mu\text{m}$ )
